# Supplementary material for: Self-assembly of DNA networks at the air–water interface over time
Source: Royal Society of Chemistry journal article supplement (doi:10.1039/c3ra42099j), 2013-01-01
Supplement: c3ra42099j.pdf [file c3ra42099j.pdf]

## **Self-assembly of DNA networks at the air/water interface over time**

Xuan Dai<sup>1&</sup>, Chuanwan Wei<sup>1&</sup>, Zhengyuan Li<sup>1</sup>, Zhifang Sun<sup>1</sup>, Rujuan Shen<sup>2</sup> and Yi Zhang<sup>1\*</sup>  
<sup>1</sup>\*<sup>1</sup>College of Chemistry and Chemical Engineering, and <sup>2</sup> State Key Laboratory of Powder Metallurgy,  
Central South University, Changsha, 410083 China

Correspondence: yzhangcsu@csu.edu.cn (Y. Zhang)

Tel/Fax: (+86) 731 88836954/88836616

\*Corresponding author: [yzhangcsu@mail.csu.edu.cn](mailto:yzhangcsu@mail.csu.edu.cn)

<sup>1</sup>These two authors contributed equally to this work.

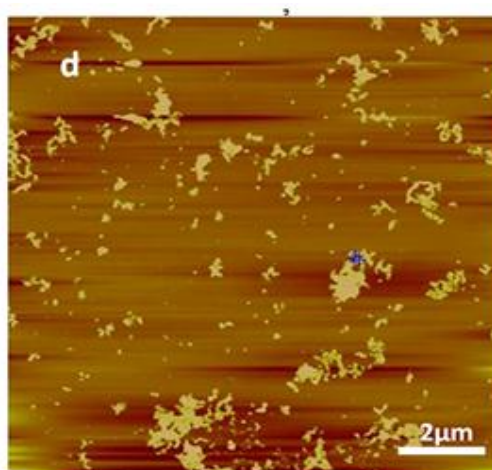

Figure S1. AFM image of DNA coils formed by dropping DNA solution on top of silicon surface.

\*Corresponding author: [yzhangcsu@mail.csu.edu.cn](mailto:yzhangcsu@mail.csu.edu.cn)

<sup>1</sup>These two authors contributed equally to this work.

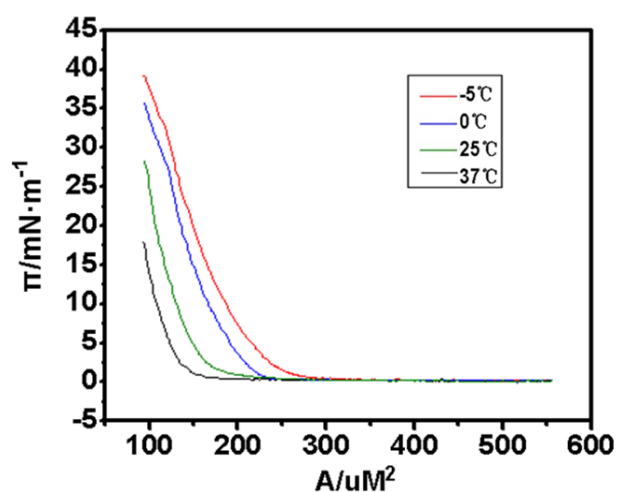

Figure S2. Surface pressure-area isotherms of DNA assembled for 24h under (a) -5°C; (b) 0°C; (c) 25°C; (d) 37°C. (c)  $\pi$ -A isotherm of pure water cultivated for 48h at 25°C (d) AFM images of the DNA aggregates that formed by directly dipping DNA solution on to the silicon substrate

\*Corresponding author: [yzhangcsu@mail.csu.edu.cn](mailto:yzhangcsu@mail.csu.edu.cn)

<sup>1</sup>These two authors contributed equally to this work.

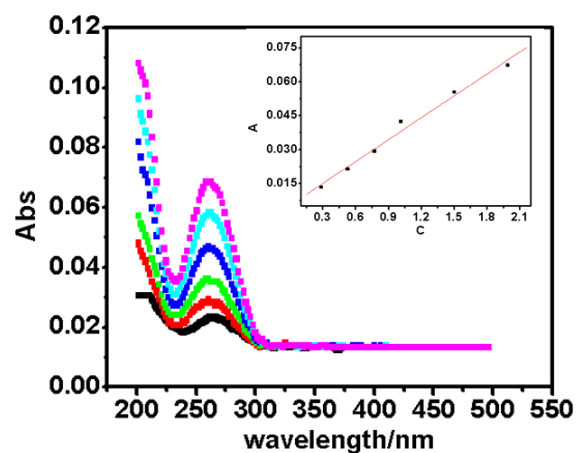

Figure S3. UV-vis absorption spectrum of salmon sperm DNA monolayers. The concentration of DNA ranged from 0.025 to 0.200g/L. Insert: image of the absorption DNA at varies concentrations.

\*Corresponding author: [yzhangcsu@mail.csu.edu.cn](mailto:yzhangcsu@mail.csu.edu.cn)

<sup>1</sup>These two authors contributed equally to this work.
